# Supplementary material for: Terephthalate as a probe for photochemically generated hydroxyl radical
Source: Royal Society of Chemistry journal article supplement (doi:10.1039/c0em00160k), 2010-01-01
Supplement: c0em00160k.pdf [file c0em00160k.pdf]

## Electronic Supporting Information

### Terephthalate as a probe for photochemically generated hydroxyl radical

Sarah E. Page,<sup>a</sup> William A. Arnold\*<sup>b</sup> and Kristopher McNeill\*<sup>c</sup>

<sup>a</sup> Department of Chemistry, University of Minnesota, 207 Pleasant Street SE, Minneapolis, MN.

<sup>b</sup> Department of Civil Engineering, University of Minnesota, 500 Pillsbury Drive SE, Minneapolis, MN. E-mail: arnol032@umn.edu

<sup>c</sup> Department of Environmental Sciences, ETH, Zurich, Switzerland. E-mail: kristopher.mcneill@env.ethz.ch

#### pK<sub>a</sub> Determination for hTPA

To determine the pK<sub>a</sub> values for hTPA, small aliquots of hydrochloric acid were added to a hTPA solution, and the pH change versus volume added was plotted. The overall volume change was less than 2% at the end point.

The pH of the system changes the UV-visible absorption spectrum of hTPA, which will affect the photochemistry of the compound. The pK<sub>a</sub> values of hTPA were 3.62, 6.47, and 9.86 as determined from the titration shown in Figure S1.

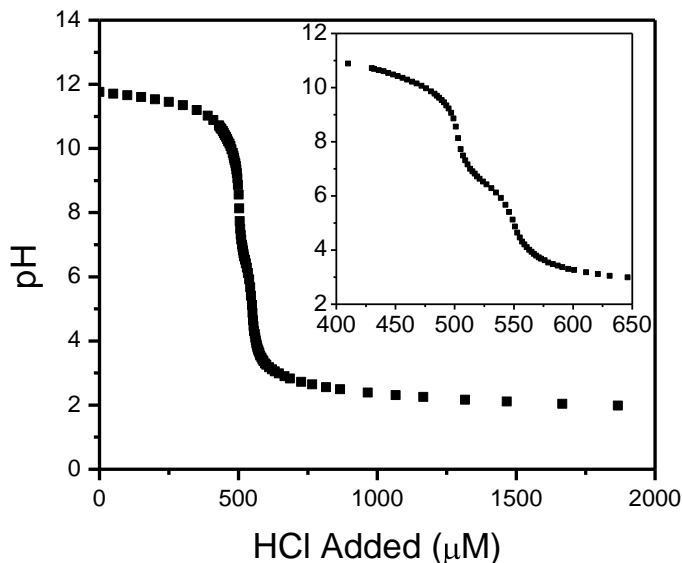

**Figure S1.** Titration curve for hydroxyterephthalate. The inset is an expansion of the region of interest around the three pK<sub>a</sub> values.
